# Supplementary material for: Toxic Y chromosome: Increased repeat expression and age-associated heterochromatin loss in male Drosophila with a young Y chromosome
Source: PLOS journal article supplement (doi:10.1371/journal.pgen.1009438), 2021-04-22
Supplement: S7 (10.1371/journal.pgen.1009438.s007) [file journal.pgen.1009438.s007]

A

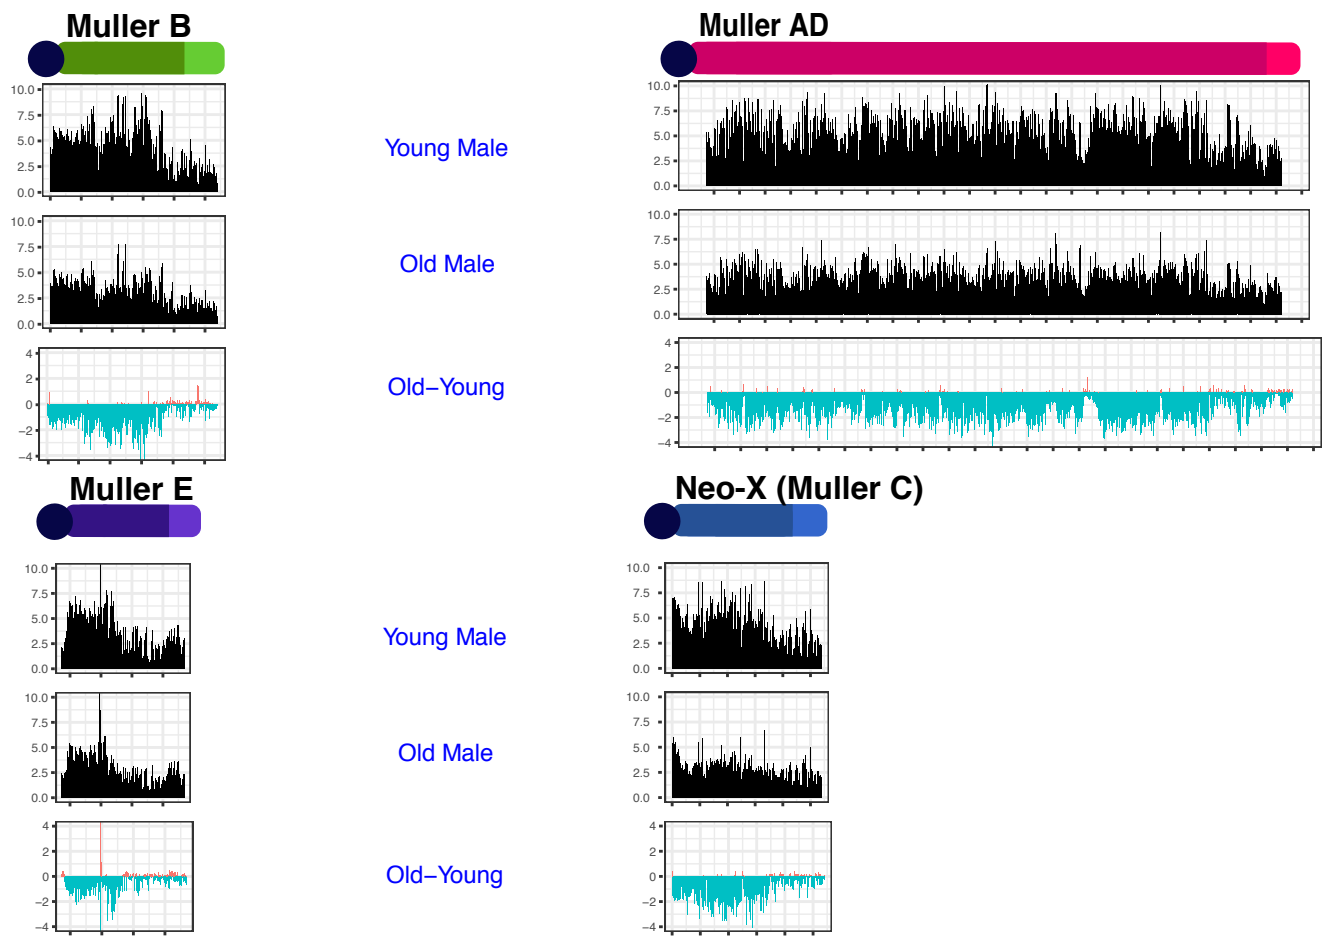

B

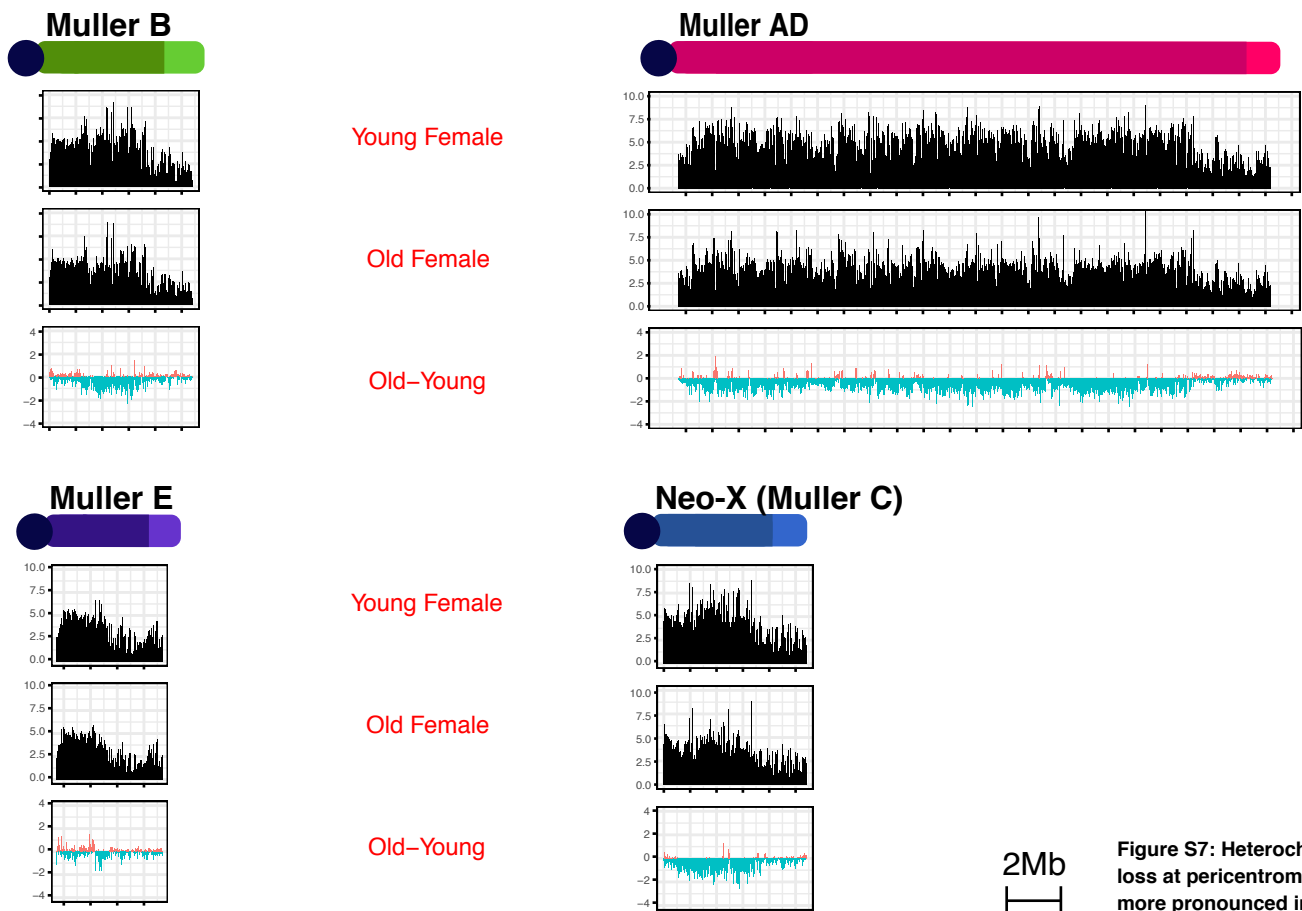

Figure S7: Heterochromatin loss at pericentromeres is more pronounced in males compared to females.
